# Supplementary material
Source: PubMed Central journal article supplement (PMC3647987)

# Supplementary Figure 2

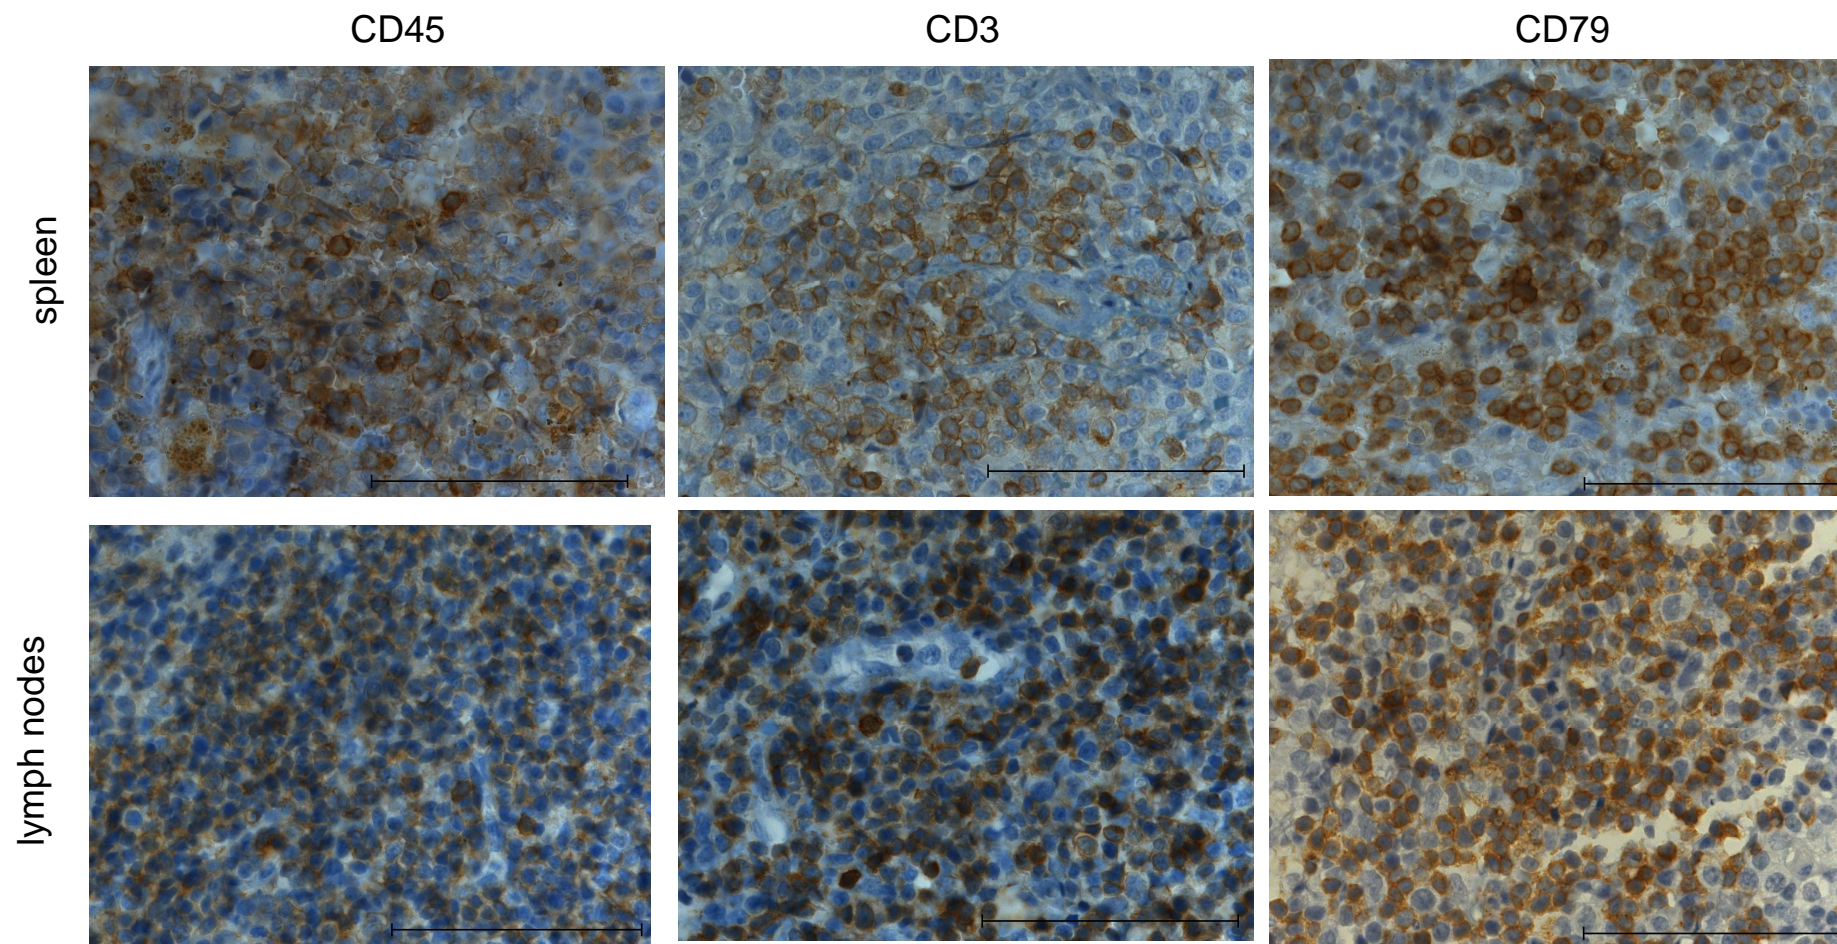

Supplement: IAI.01235-12_zii005130106so2.pdf [file IAI.01235-12_zii005130106so2.pdf]
